# Supplementary material
Source: PubMed Central journal article supplement (PMC3033318)
Supplement: 1008403108_pnas.201008403SI.pdf [file 1008403108_pnas.201008403SI.pdf]

# Supporting Information

Sansregret et al. 10.1073/pnas.1008403108

## SI Experimental Procedures

**Cell Culture.** Cells were maintained in DMEM (U2OS, NMuMG, NIH 3T3, Rat1, HEK293) or McCoy's media (HCT116 and HCT116 p53<sup>-/-</sup>) supplemented with penicillin/streptomycin, glutamine, and 10% FBS (Gibco). Insulin (10 µg/mL; Sigma) was added for NMuMG cells. Mcf10a were cultured in DMEM/F12 5% FBS, 10 µg/mL insulin, 20 ng/mL EGF, 100 ng/mL cholera toxin, and 0.5 µg/mL hydrocortisone. Stable cell populations were generated with a retrovirus (pREV/TRE vector; Clontech) expressing p110 Cux1 [Myc-(amino acids 747–1505)-HA]. After hygromycin selection for 5 d, more than 500 resistant clones were pooled together, and the population was considered to be at passage 1.

**Microscopy.** Cells were fixed in 3.7% paraformaldehyde, and stainings were done in blocking solution (PBS, 5% FBS, and 0.5% Triton X-100). Antibodies against  $\gamma$ -tubulin (Sigma T6557),  $\alpha$ -tubulin (Abcam ab4074), phospho-histone H3 (Ser28; Cell Signaling #9713) and Centrin 3 (Abcam) were used for indirect immunofluorescence, and secondary detection was done using Alexa-conjugated, species-specific secondary antibodies (Molecular Probes). DNA was stained with DAPI (Sigma). Confocal images were taken using a Zeiss 510 Meta laser scanning confocal microscope (Carl Zeiss) with a 100 $\times$  objective. Velocity software (PerkinElmer) was used for image analysis.

**FACS Analysis and Sorting.** For DNA content analysis, cells were fixed in 75% EtOH and stored at  $-20^{\circ}\text{C}$  until analysis. Cells were stained in PBS plus propidium iodide and RNase, then analyzed using a FACScan (Becton Dickinson), using single-cell gating.

Cell-cycle profiles were analyzed using FlowJo (Tree Star). Sorting was performed on a MoFlo (Dako) after staining with Hoechst 33342 (2 µg/mL, 1 h).

**Antibodies, Western Blot Analysis, Electrophoretic Mobility Shift Assay.** pS1237 CUX1 rabbit polyclonal antibodies were generated using the phospho-peptide Cys-YSQGApSPQPQHQ and purified by affinity chromatography (1). CUX1 antibodies (1,300) have been described elsewhere (2). Rabbit anti-p21 and mouse anti-p53 antibodies were a generous gift from Dr. Julian Gannon (Cancer Research UK London Research Institute, London). Electrophoretic mobility shift assay was performed using end-labeled double-stranded oligonucleotides (5'-TCGAGACGAT-ATCGATAAGCTTCTTTTC-3') as described previously (3).

**Western Blot Analysis.** Cells lysates were prepared in RIPA-M [10 mM Tris-HCl (pH 8), 1 mM EDTA, 0.5 mM EGTA, 150 mM NaCl, 1% Triton X-100, 0.5% DOC, 0.1% SDS, 1 mM PMSF, protease inhibitor mixture tablet, and PhosStop tablet (Roche)]. SDS/PAGE was performed, and proteins were transferred to PVDF membranes and blocked in Tris-buffered saline-0.1% Tween-20 (TBS 0.1%T) containing 5% milk and 3% BSA. Membranes were probed with antibodies against CUX1 ( $\alpha$ -861), pS1237 CUX1, Cyclin B (Lab Vision), or  $\gamma$ -tubulin (Sigma). Primary antibodies were incubated in TBS 0.1%T, and detection was done using an HRP-conjugated  $\alpha$ -rabbit or  $\alpha$ -mouse secondary antibody in TBS 0.1%T. Immunoreactive proteins were visualized by chemiluminescence with the ECL Western Blotting Detection Kit (Amersham Pharmacia Biotech).

1. Sansregret L, et al. (2010) Hyperphosphorylation by cyclin B/Cdk1 in mitosis resets CUX1 DNA binding clock at each cell cycle. *J Biol Chem* 285:32834–32843.
2. Moon NS, et al. (2002) Expression of N-terminally truncated isoforms of CDP/CUX is increased in human uterine leiomyomas. *Int J Cancer* 100:429–432.

3. Santaguida M, et al. (2001) Phosphorylation of the CCAAT displacement protein (CDP)/Cux transcription factor by cyclin A-Cdk1 modulates its DNA binding activity in G(2). *J Biol Chem* 276:45780–45790.

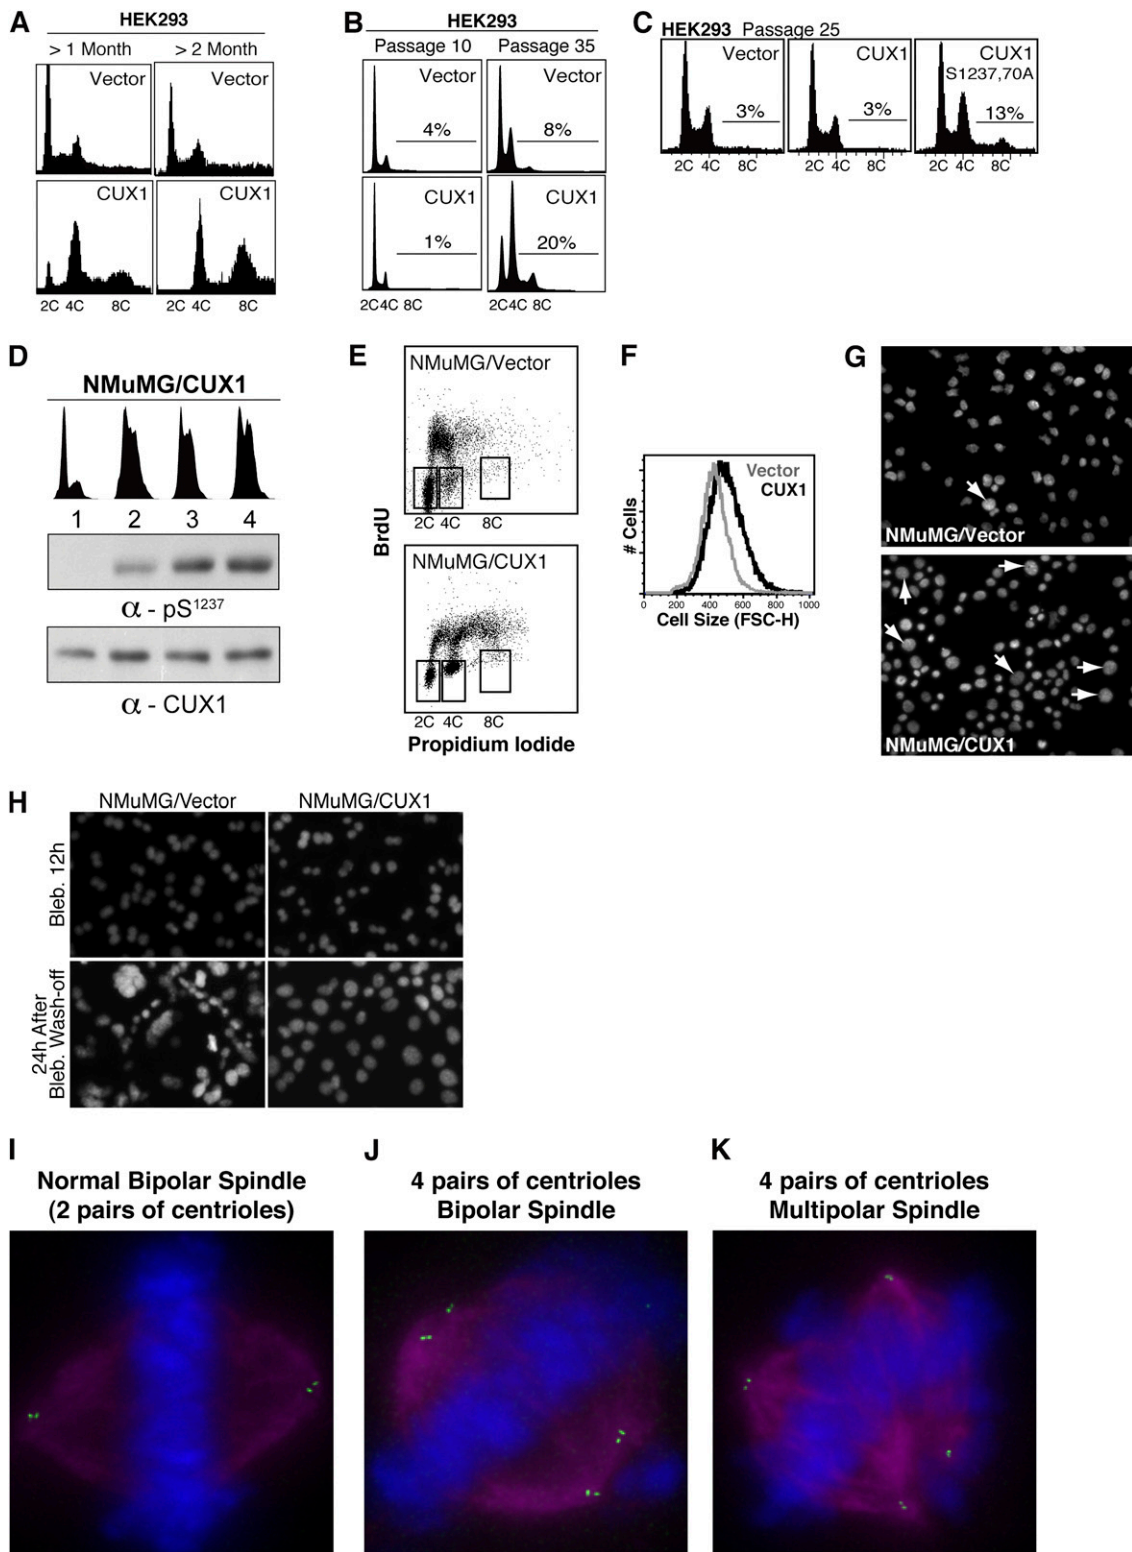

**Fig. S1.** Characterization of polyploid HEK293 and NMuMG stable cell lines. (A) Cell cycle profiles of HEK293/CUX1 or vector controls after more than 2 months in culture, where complete tetraploidization was observed (>2 mo). (B and C) Cell cycle profiles of independent populations expressing wild-type p110 CUX1 or the p110<sup>CUX1<sup>S1237,1270A</sup></sup> mutant. (D) Phosphorylation at serine 1237, which results in inhibition of CUX1 DNA binding, becomes detectable as cells progress in G2. NMuMG cells expressing p110 CUX1 were synchronized in G0 by serum starvation for 3 d and collected after serum restimulation (0 h, 18 h, 19 h, and 20 h). Immunoblotting was performed on whole-cell extracts using purified CUX1-pS<sup>1237</sup> or CUX1 antibodies using 80  $\mu$ g and 5  $\mu$ g of cell lysate, respectively [pS1237-CUX1 antibodies were described previously (1)]. (E) Late-passage NMuMG/vector and NMuMG/p110 CUX1 cells were pulse-labeled with 100  $\mu$ M BrdU for 1 h and fixed in paraformaldehyde for double staining using propidium iodide and an Alexa 649-conjugated anti-BrdU antibody. (F) Late passage tetraploid NMuMG/CUX1 are larger as determined by FACS analysis based on forward scatter. (G) Late passage NMuMG/CUX1 (unsorted population) contain cells with

Legend continued on following page





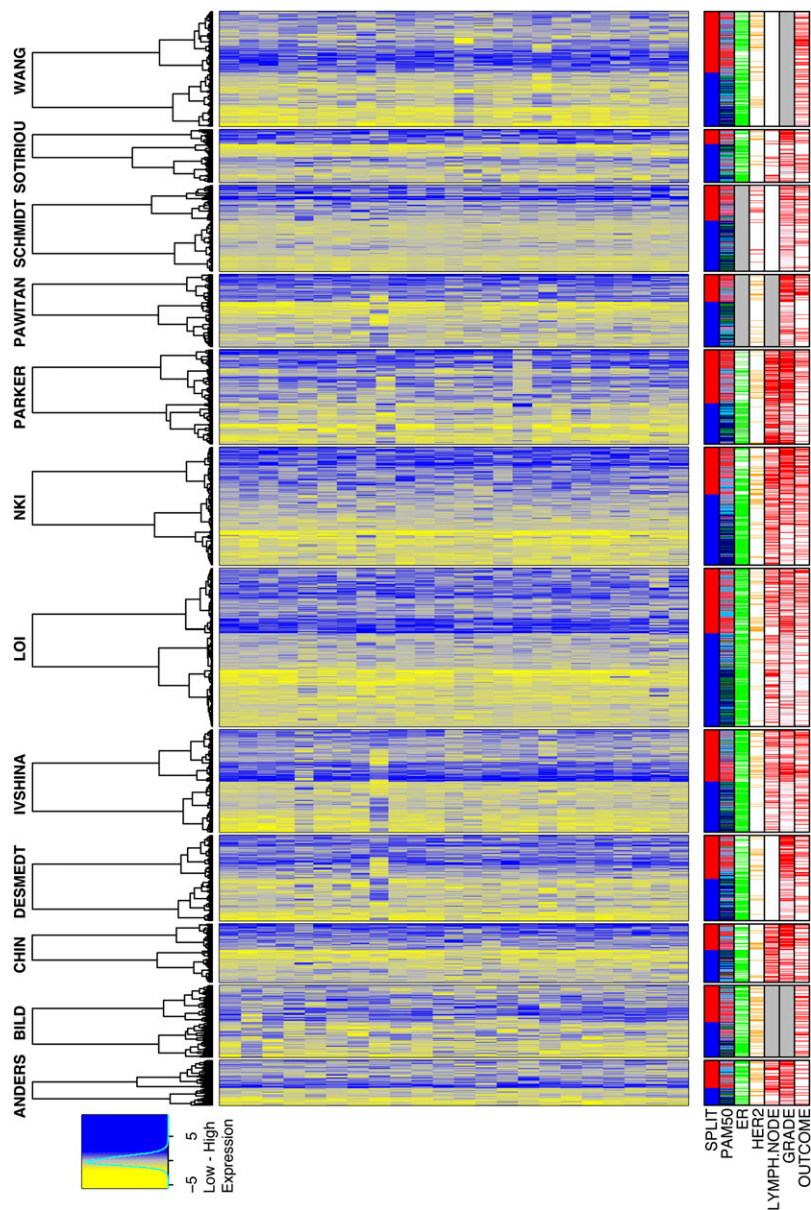

**Fig. S4.** Euclidean clustering using the 29-gene set within individual datasets. Hierarchical clustering was performed using Euclidean distance and Ward's algorithm. The width of the individual heatmap is based on patient number. Split: blue, low expression of the CUX1 signature; red, high expression. PAM50 (intrinsic subtypes): green, normal-like; dark blue, luminal A; light blue, luminal B; pink, HER2; red, basal. Estrogen receptor (ER): green, estrogen receptor positive (pathology reports); white, ER negative. HER2: yellow, positive (pathology reports); white, negative. Lymph node: red, positive; white, negative. Grade: white, 1; pink, 2; red, 3. Outcome: red, relapse or deceased patient; white, no relapse or survival. Gray, no information available. See refs. 1–12.

- Anders CK, et al. (2008) Age-specific differences in oncogenic pathway deregulation seen in human breast tumors. *PLoS ONE* 3:e1373.
- Bild AH, et al. (2006) Oncogenic pathway signatures in human cancers as a guide to targeted therapies. *Nature* 439:353–357.
- Chin K, et al. (2006) Genomic and transcriptional aberrations linked to breast cancer pathophysiology. *Cancer Cell* 10:529–541.
- Desmedt C, et al.; TRANSBIG Consortium (2007) Strong time dependence of the 76-gene prognostic signature for node-negative breast cancer patients in the TRANSBIG multicenter independent validation series. *Clin Cancer Res* 13:3207–3214.
- Ivshina AV, et al. (2006) Genetic reclassification of histologic grade delineates new clinical subtypes of breast cancer. *Cancer Res* 66:10292–10301.
- Loi S, et al. (2008) Predicting prognosis using molecular profiling in estrogen receptor-positive breast cancer treated with tamoxifen. *BMC Genomics* 9:239.
- van de Vijver MJ, et al. (2002) A gene-expression signature as a predictor of survival in breast cancer. *N Engl J Med* 347:1999–2009.
- Parker JS, et al. (2009) Supervised risk predictor of breast cancer based on intrinsic subtypes. *J Clin Oncol* 27:1160–1167.
- Pawitan Y, et al. (2005) Gene expression profiling spares early breast cancer patients from adjuvant therapy: Derived and validated in two population-based cohorts. *Breast Cancer Res* 7:R953–R964.
- Schmidt M, et al. (2008) The humoral immune system has a key prognostic impact in node-negative breast cancer. *Cancer Res* 68:5405–5413.
- Sotiriou C, et al. (2006) Gene expression profiling in breast cancer: Understanding the molecular basis of histologic grade to improve prognosis. *J Natl Cancer Inst* 98:262–272.
- Wang Y, et al. (2005) Gene-expression profiles to predict distant metastasis of lymph-node-negative primary breast cancer. *Lancet* 365:671–679.





**Table S1. Cell division followed by time-lapse microscopy**

| NMuMG               | Vector (late passage) |                       | p110 CUX1 (early passage) |                       | Sorted 8C p110 CUX1 (late passage) |                       |
|---------------------|-----------------------|-----------------------|---------------------------|-----------------------|------------------------------------|-----------------------|
|                     | % Cells               | Time in mitosis (min) | % Cells                   | Time in mitosis (min) | % Cells                            | Time in mitosis (min) |
| Bipolar division    | 99.7                  | 38.6                  | 100                       | 38.5                  | 100                                | 48.0*                 |
| Multipolar division | 0.3                   | nd                    | 0                         | —                     | 0                                  | —                     |

Frequency of bipolar and multipolar division was assessed for late-passage NMuMG/vector ( $n = 679$ ), early-passage NMuMG/CUX1 ( $n = 596$ ), and late-passage 8C-sorted NMuMG/CUX1 cells ( $n = 698$ ). Images were taken every 5 min, and the average time for mitosis was measured ( $n = 267$  for vector;  $n = 267$  for early-passage CUX1 cells;  $n = 274$  for 8C-sorted cells). Mitosis was extended by  $\approx 24\%$  in tetraploid NMuMG/CUX1 cells (48 min) compared with NMuMG/vector cells (38.6 min) or low-passage NMuMG/CUX1 cells (38.5 min). \* $P < 0.0001$ .

**Table S2. Blebbistatin treatment generates binucleated cells**

| Condition          | NMuMG                   | Mononucleated (%) | Binucleated (%) | Multinucleated (%) |
|--------------------|-------------------------|-------------------|-----------------|--------------------|
| Untreated          | Vector ( $n = 673$ )    | 99                | 1               | 0                  |
|                    | p110 CUX1 ( $n = 482$ ) | 100               | 0               | 0                  |
| After blebbistatin | Vector ( $n = 673$ )    | 14                | 84              | 2                  |
|                    | p110 CUX1 ( $n = 482$ ) | 11                | 88              | 1                  |

Frequency of mononucleated, binucleated or multinucleated cells after 12 h incubation with 100  $\mu\text{M}$  blebbistatin was assessed by microscopy using DAPI staining. The low percentage of multinucleated cells and the low percentage of mononucleated cells suggest that blebbistatin treatment did not encompass more than one doubling time.





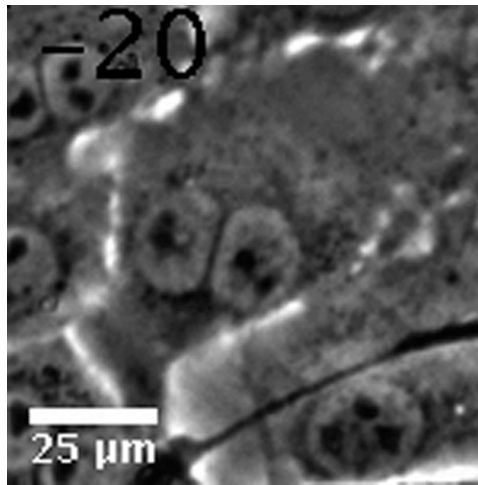

**Movie S1.** Binucleated NMuMG/vector cell undergoing a tripolar division. Transient (12-h) treatment with 100  $\mu\text{M}$  blebbistatin was used to induce binucleation in early-passage NMuMG cells. Time (in minutes) at which each frame was taken is indicated.

[Movie S1](#)

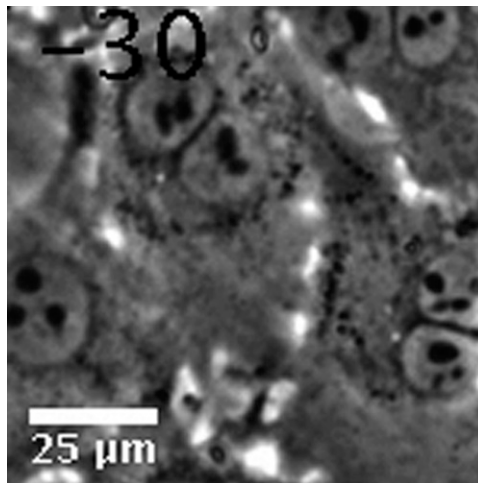

**Movie S2.** Binucleated NMuMG/vector cell undergoing a tripolar anaphase with incomplete cytokinesis, resulting in one mono- and one binucleated daughter cell. Transient (12-h) treatment with 100  $\mu\text{M}$  blebbistatin was used to induce binucleation in early-passage NMuMG cells. Time (in minutes) at which each frame was taken is indicated.

[Movie S2](#)

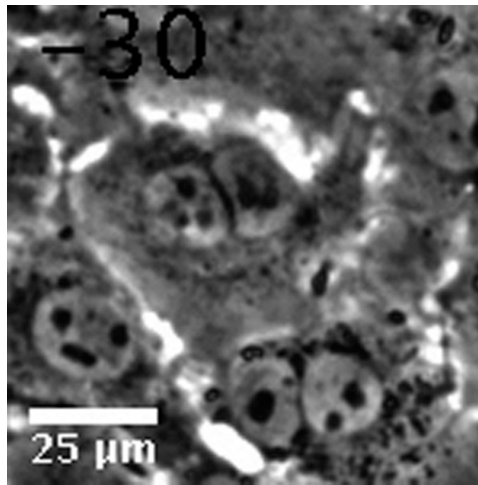

**Movie S3.** Binucleated NMuMG/CUX1 cell undergoing bipolar division. Transient (12-h) treatment with 100  $\mu\text{M}$  blebbistatin was used to induce binucleation in early-passage NMuMG cells. Time (in minutes) at which each frame was taken is indicated.

[Movie S3](#)

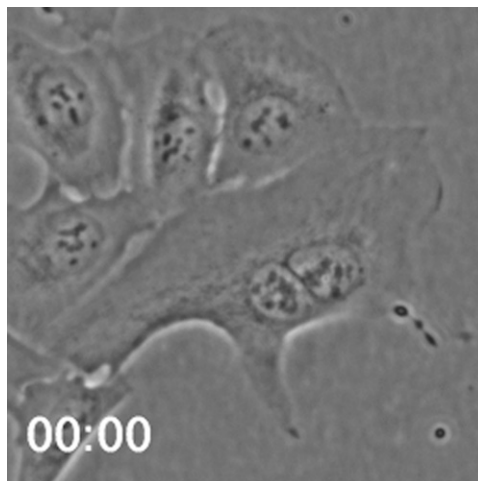

**Movie S4.** Binucleated U2OS/vector cell undergoing a multipolar division. U2OS/vector cells were treated for 8 h with 100  $\mu\text{M}$  blebbistatin. Sixteen hours after release, cells were followed by time-lapse microscopy, during which 10  $\mu\text{M}$  MG132 was added for 90 min and washed out. We determined the fate of binucleated cells entering mitosis just before or soon after MG132 addition. Neighboring binucleated cells dividing without being exposed to MG132 were used as control.

[Movie S4](#)

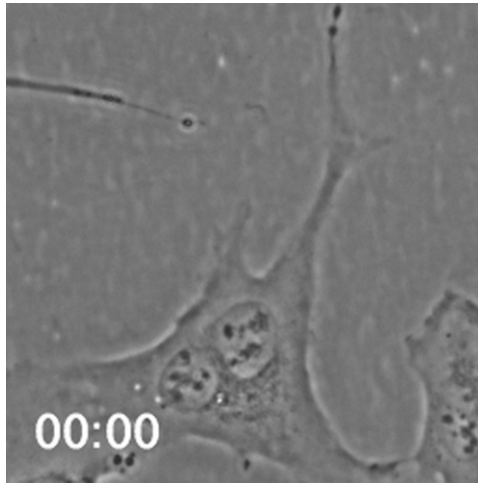

**Movie S5.** Binucleated U2OS/vector cell undergoing a bipolar division in the presence after transient exposure to 10  $\mu$ M MG132. U2OS/vector cells were treated for 8 h with 100  $\mu$ M blebbistatin. Sixteen hours after release, cells were followed by time-lapse microscopy, during which 10  $\mu$ M MG132 was added for 90 min and washed out. We determined the fate of binucleated cells entering mitosis just before or soon after MG132 addition. Neighboring binucleated cells dividing without being exposed to MG132 were used as control.

[Movie S5](#)
